# Supplementary material for: Effects of Heme Site (FA1) Ligands Bilirubin, Biliverdin, Hemin, and Methyl Orange on the Albumin Binding of Site I Marker Warfarin: Complex Allosteric Interactions
Source: MDPI journal article supplement (doi:10.3390/ijms232214007), 2022-11-13
Supplement: s1 [file s1]

# **Effects of Heme Site (FA1) Ligands Bilirubin, Biliverdin, Hemin, and Methyl Orange on the Albumin Binding of Site I Marker Warfarin: Complex Allosteric Interactions**

## **SUPPLEMENTARY MATERIAL**

**Beáta Lemli,<sup>1,2</sup> Zuzana Lomozová,<sup>3</sup> Tamás Huber,<sup>4</sup> András Lukács,<sup>4</sup> Miklós Poór<sup>1,5,\*</sup>**

<sup>1</sup> Department of Pharmacology, Faculty of Pharmacy, University of Pécs, Rókus u. 2, H-7624 Pécs, Hungary

<sup>2</sup> Green Chemistry Research Group, János Szentágothai Research Center, University of Pécs, Ifjúság útja 20, H-7624 Pécs, Hungary

<sup>3</sup> The Department of Pharmacognosy and Pharmaceutical Botany, Faculty of Pharmacy in Hradec Králové, Charles University, Akademika Heyrovského 1203, 500 05 Hradec Králové, Czech Republic

<sup>4</sup> Department of Biophysics, Medical School, University of Pécs, Szigeti út 12, H-7624 Pécs, Hungary

<sup>5</sup> Lab-on-a-Chip Research Group, János Szentágothai Research Centre, University of Pécs, Ifjúság útja 20, H-7624 Pécs, Hungary

\* Correspondence: poor.miklos@pte.hu; Tel: +36-72-501-500 ext: 28316

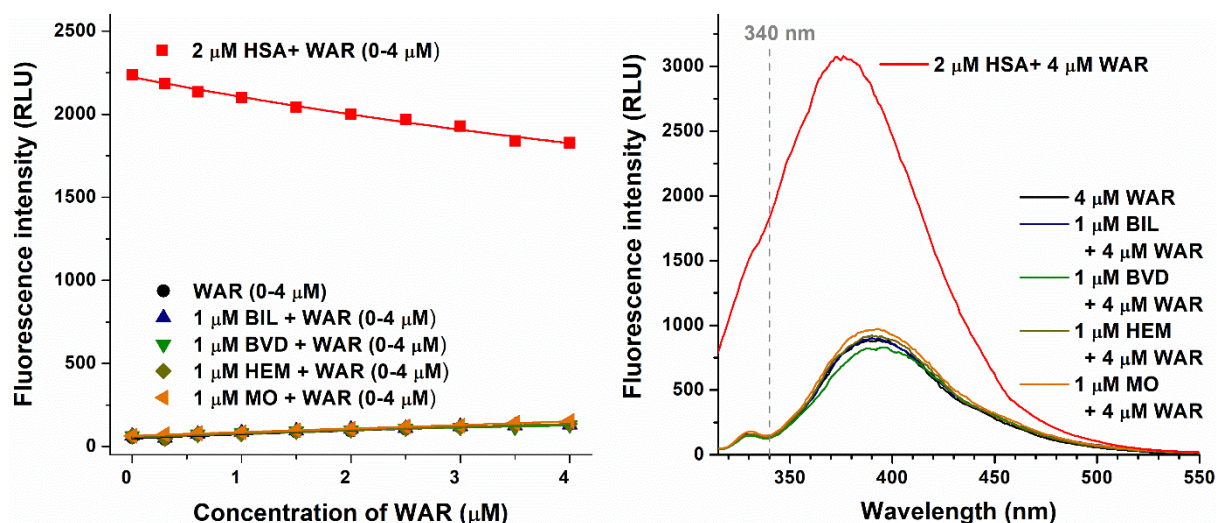

**Figure S1:** Fluorescence emission signal (at 340 nm) and representative emission spectra of warfarin in the absence and presence of Heme site ligands. **Left panel:** Fluorescence emission signal of albumin (HSA, 2  $\mu\text{M}$ ) in the presence of increasing concentrations warfarin (WAR, 0-4  $\mu\text{M}$ ) (**red**). Fluorescence emission signal of WAR (0-4  $\mu\text{M}$ ) without (**black**) and with bilirubin (BIL, 1  $\mu\text{M}$ ; **blue**), biliverdin (BVD, 1  $\mu\text{M}$ ; **green**), hemin (HEM, 1  $\mu\text{M}$ ; **dark yellow**), and methyl orange (MO, 1  $\mu\text{M}$ ; **orange**) in PBS (pH 7.4;  $\lambda_{\text{ex}} = 295 \text{ nm}$ ,  $\lambda_{\text{em}} = 340 \text{ nm}$ ). **Right panel:** Fluorescence emission spectrum of HSA in the presence of WAR (**red**). Fluorescence emission spectrum of WAR without (**black**) and with BIL (**blue**), BVD (**green**), HEM (**dark yellow**), and MO (**orange**) in PBS (pH 7.4;  $\lambda_{\text{ex}} = 295 \text{ nm}$ ).

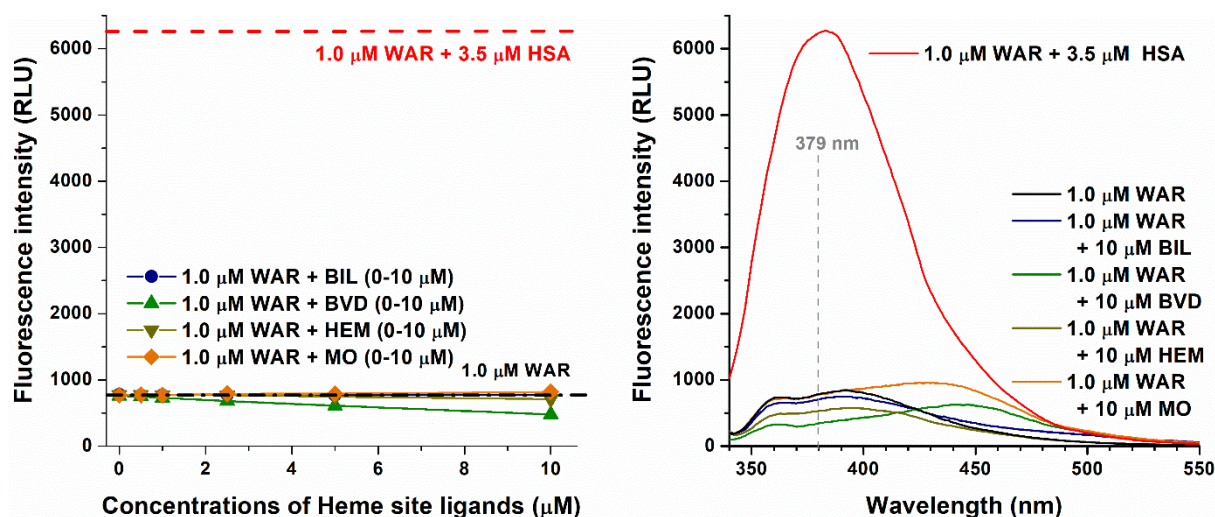

**Figure S2:** Fluorescence emission signal (at 379 nm) and representative emission spectra of warfarin in the absence and presence of Heme site ligands. **Left panel:** Fluorescence emission signal of warfarin-HSA complex (**red dashed line**), warfarin (WAR) alone (**black dash-dotted line**), and WAR in the presence of increasing concentrations of bilirubin (BIL; **blue**), biliverdin (BVD; **green**), hemin (HEM; **dark yellow**) and methyl orange (MO; **orange**) in PBS (pH 7.4;  $\lambda_{\text{ex}} = 317 \text{ nm}$ ,  $\lambda_{\text{em}} = 379 \text{ nm}$ ). **Right panel:** Fluorescence emission spectra of WAR-HSA complex (**red**), WAR alone (**black**), and WAR in the presence of BIL (**blue**), BVD (**green**), HEM (**dark yellow**), and MO (**orange**) in PBS (pH 7.4;  $\lambda_{\text{ex}} = 317 \text{ nm}$ ).

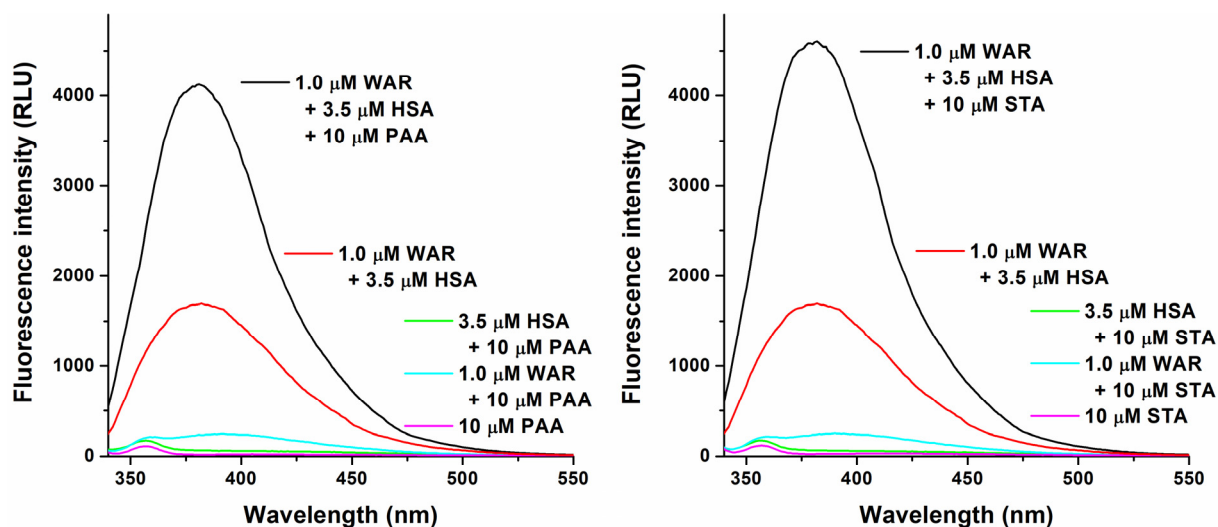

**Figure S3:** Representative emission spectra of palmitic acid and stearic acid without and with warfarin, albumin, and warfarin + albumin. Emission spectra of palmitic acid (PAA, 10  $\mu\text{M}$ ; *left panel*) and stearic acid (STA, 10  $\mu\text{M}$ ; *right panel*) in the absence and presence of warfarin (WAR, 1.0  $\mu\text{M}$ ), albumin (HSA, 3.5  $\mu\text{M}$ ), and WAR-HSA complex in PBS (pH 7.4;  $\lambda_{\text{ex}} = 317$  nm).
